# Supplementary material for: Modern maize varieties going local in the semi-arid zone in Tanzania
Source: PubMed Central journal article supplement (PMC3890540; doi:10.1186/1471-2148-14-1), 2014-01-02
Supplement: 1471-2148-14-1-S2.pdf [file 1471-2148-14-1-S2.pdf]

**Table S2.** Details on the maize varieties grown in Mangae. Sources of information: Survey in Mangae July 2010 and National variety list 1950-2008 in (Ngwediagi et al., 2009).

| Variety  | Year released and institution | Information                                                                                                                                                                                                                                                                                                                                                                          |
|----------|-------------------------------|--------------------------------------------------------------------------------------------------------------------------------------------------------------------------------------------------------------------------------------------------------------------------------------------------------------------------------------------------------------------------------------|
| Katumani | 1950s by KARI Kenya           | White Flint Hybrid<br>Low rainfall areas<br>Suitable <1500 masl<br>Achievable yield: 3.0-3.5 tonns/ha                                                                                                                                                                                                                                                                                |
| Kito     | 1983                          | Open pollinated variety (OPV)<br>White Flint<br>Early maturity: 90 days<br>Drought avoiding<br>Low rainfall areas                                                                                                                                                                                                                                                                    |
| Staha    | 1983 by ARI Ilonga            | OPV<br>White Flint-Dent<br>Based on cross between Ilonga composite (local breeding population) (50%), Tuxpeño (CIMMYT population) (45%) and small proportion (5%) of Katumbili<br>Large ears<br>Late maturity: 120 days<br>Drought tolerant<br>Good standability, not very tall<br>Tolerant to maize streak virus (MSV)<br>Suitable <900 masl<br>Achievable yield: 4.0 -5.0 tonns/ha |
| TMV 1    | 1987 by ARI Ilonga            | OPV<br>TMV 1: Tanzania Maize Variety 1<br>White Flint<br>Based on CIMMYT/IITA breeding population 11 (includes East African material and “La revolution” from Madagascar)<br>Intermediary maturity: 110 days<br>Resistant to MSV and rust<br>Suitable <1500 masl<br>Achievable yield: 4.5 tonns/ha                                                                                   |
| TAN250   | Tanseed International         | TAN 250 is based on CIMMYT’s ZM 401 selected for tolerance to drought and low soil fertility<br>Early maturity variety<br>Excellent resistance to MSV and Grey leaf spot, good resistance to Turcium leaf blight, Cob rot and Common rust<br>Suitable at low to medium altitude<br>Achievable yield: 3-5 tonns/ha                                                                    |
