# Supplementary material for: Modern maize varieties going local in the semi-arid zone in Tanzania
Source: PubMed Central journal article supplement (PMC3890540; doi:10.1186/1471-2148-14-1), 2014-01-02
Supplement: 1471-2148-14-1-S3.pdf [file 1471-2148-14-1-S3.pdf]

**Table S3.** Pairwise genetic differentiation between seed lots. Above diagonal:  $F_{ST}$  for comparison of the 12 sampled populations. Below diagonal: Significance level.

|                          | 1  | 2       | 3       | 4       | 5       | 6       | 7       | 8       | 9       | 10      | 11      | 12      |
|--------------------------|----|---------|---------|---------|---------|---------|---------|---------|---------|---------|---------|---------|
| Staha breeder's seed (1) |    | 0.09167 | 0.01135 | 0.04792 | 0.08514 | 0.09249 | 0.13823 | 0.21596 | 0.14367 | 0.21758 | 0.08094 | 0.23902 |
| Staha basic seed (2)     | ** |         | 0.09901 | 0.15404 | 0.15629 | 0.17059 | 0.22064 | 0.32257 | 0.23049 | 0.30926 | 0.19453 | 0.35390 |
| Staha commercial (3)     | NS | **      |         | 0.06361 | 0.06316 | 0.11938 | 0.15275 | 0.21523 | 0.12308 | 0.23853 | 0.09576 | 0.27232 |
| Staha local 1 (4)        | ** | **      | **      |         | 0.12382 | 0.13746 | 0.13188 | 0.20784 | 0.17493 | 0.22251 | 0.09162 | 0.29642 |
| Staha local 2 (5)        | *  | **      | **      | **      |         | 0.18467 | 0.18243 | 0.26865 | 0.22625 | 0.27931 | 0.14423 | 0.32304 |
| Staha recycled (6)       | ** | **      | **      | **      | **      |         | 0.19960 | 0.25750 | 0.20664 | 0.24842 | 0.12566 | 0.28529 |
| TMV1 breeder's (7)       | ** | **      | **      | **      | **      | **      |         | 0.07903 | 0.03539 | 0.11639 | 0.15011 | 0.27140 |
| TMV1 basic (8)           | ** | **      | **      | **      | **      | **      | **      |         | 0.11742 | 0.17342 | 0.23597 | 0.37968 |
| TMV1 commercial (9)      | ** | **      | **      | *       | **      | **      | NS      | *       |         | 0.12707 | 0.16039 | 0.36942 |
| TMV1 local (10)          | ** | **      | **      | **      | **      | **      | **      | **      | **      |         | 0.19960 | 0.36143 |
| Local variety 1 (11)     | ** | **      | **      | **      | **      | **      | **      | **      | **      | **      |         | 0.26596 |
| Local variety 2 (12)     | ** | **      | **      | **      | **      | **      | **      | **      | **      | **      | **      |         |

\*Significant for  $p < 0,05$ , \*\*Significant for  $p < 0,01$ , NS not significant
